# Supplementary material for: ACE-2, TMPRSS2, and Neuropilin-1 Receptor Expression on Human Brain Astrocytes and Pericytes and SARS-CoV-2 Infection Kinetics
Source: MDPI journal article supplement (doi:10.3390/ijms24108622), 2023-05-11
Supplement: s1 [file s1]

## Supplementary Information

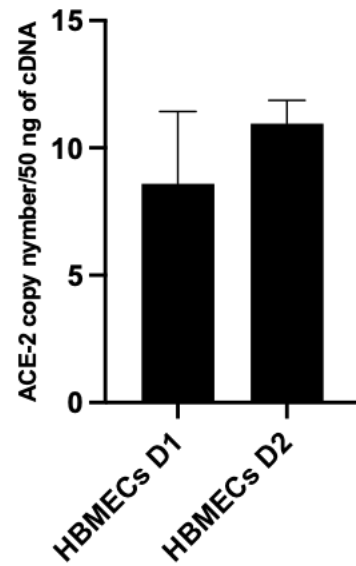

**Supplementary Figure S1.** ACE-2 gene copy numbers quantitated in 50ng of cDNA of human lymph node derived endothelial cells, (hLNECs), brain derived endothelial cells (hBMVECs) by ddPCR assay.
